# Supplementary material for: Structural and functional neuroimaging studies in generalized anxiety disorder: a systematic review
Source: PubMed Central journal article supplement — Braz J Psychiatry. 2019 May 16;41(4):336–62. doi: 10.1590/1516-4446-2018-0108 (PMC6804309; doi:10.1590/1516-4446-2018-0108), 2019-05-16
Supplement: bjp-41-04-336-s001.pdf [file bjp-41-04-336-s001.pdf]

**Supplementary Table S1 - Main cerebral areas involved in GAD**

**1) STRUCTURAL FINDINGS**

| Cerebral region   | Main findings from original studies                                      |                                                                                                                                       |                       | DTI and DWI findings                                                                                                               |
|-------------------|--------------------------------------------------------------------------|---------------------------------------------------------------------------------------------------------------------------------------|-----------------------|------------------------------------------------------------------------------------------------------------------------------------|
|                   | Increased volume                                                         | Decreased volume                                                                                                                      | No differences        |                                                                                                                                    |
| Amygdala          | - De Bellis et al. 2000<br>- Schienle et al. 2011<br>- Etkin et al. 2009 | - Milham et al. 2005                                                                                                                  | - Mohlman et al. 2009 | - Zhang et al. 2013 (increased FA in right amygdala)                                                                               |
| Cingulate cortex  | - Strawn et al. 2015<br>- Liao et al. 2014                               | - Strawn et al. 2013                                                                                                                  |                       | - Zhang et al. 2013 (decreased FA in caudal and medial cingulate)                                                                  |
| Prefrontal cortex | - Cha et al. 2014b                                                       | - Hilbert et al. 2015<br>- Moon et al. 2016<br>- Moon et al. 2015<br>- Strawn et al. 2015<br>- Moon et al. 2016<br>- Moon et al. 2016 | - Mohlman et al. 2009 |                                                                                                                                    |
| Parietal areas    | - Strawn et al. 2013<br>- De Bellis et al. 2002                          | - Makovac et al. 2016<br>- Moon et al. 2014                                                                                           |                       | - Zhang et al. 2011 (increased FA in postcentral gyrus)<br>- Brambilla et al. 2011 (increased ADC in parietal cortex and splenium) |

|               |                                                                                                                                                               |                                                                                                                                                                                                                                                                                                                                        |                                                                                                  |
|---------------|---------------------------------------------------------------------------------------------------------------------------------------------------------------|----------------------------------------------------------------------------------------------------------------------------------------------------------------------------------------------------------------------------------------------------------------------------------------------------------------------------------------|--------------------------------------------------------------------------------------------------|
| Other regions | <ul style="list-style-type: none"> <li>- Hilbert et al. 2015</li> <li>- Liao et al. 2013</li> <li>- Liao et al. 2014</li> <li>- Molent et al. 2017</li> </ul> | <ul style="list-style-type: none"> <li>- Moon et al. 2014</li> <li>- Moon et al. 2016</li> <li>- Moon et al. 2016</li> <li>- Moon et al. 2015</li> <li>- Moon et al. 2015</li> <li>- Strawn et al. 2015</li> <li>- Cha et al. 2016</li> <li>- Wang et al. 2016</li> <li>- Makovac et al. 2016</li> <li>- Molent et al. 2017</li> </ul> | <ul style="list-style-type: none"> <li>- Wang et al. 2016</li> <li>- Liao et al. 2014</li> </ul> |
|---------------|---------------------------------------------------------------------------------------------------------------------------------------------------------------|----------------------------------------------------------------------------------------------------------------------------------------------------------------------------------------------------------------------------------------------------------------------------------------------------------------------------------------|--------------------------------------------------------------------------------------------------|

---

**2) ACTIVATION FINDINGS**

---

| Cerebral region | Main findings from original studies                                                                                                                                                                                    |                                                                                                                                                                                                                                                                                                                                                                                                                                                                              |                                                                                                                                                                                                                                                        |                                                                                                                                                                                        |                                                                                                                                 |
|-----------------|------------------------------------------------------------------------------------------------------------------------------------------------------------------------------------------------------------------------|------------------------------------------------------------------------------------------------------------------------------------------------------------------------------------------------------------------------------------------------------------------------------------------------------------------------------------------------------------------------------------------------------------------------------------------------------------------------------|--------------------------------------------------------------------------------------------------------------------------------------------------------------------------------------------------------------------------------------------------------|----------------------------------------------------------------------------------------------------------------------------------------------------------------------------------------|---------------------------------------------------------------------------------------------------------------------------------|
|                 | Decreased activation                                                                                                                                                                                                   | Increased activation                                                                                                                                                                                                                                                                                                                                                                                                                                                         | Increased connectivity                                                                                                                                                                                                                                 | Decreased connectivity                                                                                                                                                                 | No differences                                                                                                                  |
| Amygdala        |                                                                                                                                                                                                                        |                                                                                                                                                                                                                                                                                                                                                                                                                                                                              |                                                                                                                                                                                                                                                        |                                                                                                                                                                                        |                                                                                                                                 |
| Bilateral       | <ul style="list-style-type: none"> <li>- Fonzo et al. 2014</li> <li>- Yassa et al. 2012</li> <li>- Liu et al. 2015</li> <li>- Blair et al. 2012</li> <li>- Carlson et al. 2017</li> <li>- Brown et al. 2015</li> </ul> | <ul style="list-style-type: none"> <li>- Krain et al. 2008</li> <li>- Etkin &amp; Schatzberg 2011</li> <li>- Nitschke et al. 2009</li> <li>- Hölzel et al. 2013</li> <li>- Park et al. 2015</li> <li>- Liu et al. 2015</li> <li>- Fonzo et al. 2014</li> <li>- Fitzgerald et al. 2017</li> <li>- Ellard et al. 2017</li> <li>- Mohlman et al. 2017</li> <li>- Li et al. 2016</li> <li>- Karim et al. 2016</li> <li>- Buff et al. 2017</li> <li>- Buff et al. 2017</li> </ul> | <ul style="list-style-type: none"> <li>- Etkin et al. 2009</li> <li>- Fonzo et al. 2014</li> <li>- Makovac et al. 2015</li> <li>- Buff et al. 2016</li> <li>- Mohlman et al. 2017</li> <li>- Qiao et al. 2017</li> <li>- Rabany et al. 2017</li> </ul> | <ul style="list-style-type: none"> <li>- Etkin et al. 2009</li> <li>- Roy et al. 2013</li> <li>- Hölzel et al. 2013</li> <li>- Makova et al. 2016</li> <li>- Li et al. 2016</li> </ul> | <ul style="list-style-type: none"> <li>- Palm et al. 2011</li> <li>- Whalen et al. 2008</li> <li>- Fonzo et al. 2014</li> </ul> |
| Right           | <ul style="list-style-type: none"> <li>- Blair et al. 2008</li> </ul>                                                                                                                                                  | <ul style="list-style-type: none"> <li>- Thomas et al. 2001</li> <li>- Monk et al. 2008</li> </ul>                                                                                                                                                                                                                                                                                                                                                                           | <ul style="list-style-type: none"> <li>- Meeten et al. 2016</li> </ul>                                                                                                                                                                                 | <ul style="list-style-type: none"> <li>- Strawn et al. 2012</li> <li>- Makovac et al. 2016</li> </ul>                                                                                  |                                                                                                                                 |

|                   |                                                                                                                                                                                              |                                                                                                                                                                                                                                                 |                                                                                            |                                                                   |
|-------------------|----------------------------------------------------------------------------------------------------------------------------------------------------------------------------------------------|-------------------------------------------------------------------------------------------------------------------------------------------------------------------------------------------------------------------------------------------------|--------------------------------------------------------------------------------------------|-------------------------------------------------------------------|
|                   |                                                                                                                                                                                              | - McClure et al. 2007                                                                                                                                                                                                                           |                                                                                            |                                                                   |
| Left              |                                                                                                                                                                                              |                                                                                                                                                                                                                                                 | - Strawn et al. 2012                                                                       |                                                                   |
| ACC               | - Palm, Elliott et al. 2011<br>- Fonzo et al. 2014<br>- Ball et al. 2013<br>- Diwadkar et al. 2017<br>- Burkhouse et al. 2016<br>- Xia et al. 2017<br>- Buff et al. 2017                     | - Nitschke et al. 2009<br>- Krain et al. 2008<br>- Etkin & Schatzberg 2011<br>- Paulesu et al. 2010<br>- Park et al 2015<br>- Ellard et al 2017<br>- Buff et al 2016<br>- McClure et al. 2007<br>- Burkhouse et al. 2018<br>- Moon et al., 2015 | - Etkin et al. 2009<br>- Wang et al. 2016                                                  | - Whalen et al. 2008<br>- Etkin et al. 2010                       |
| Prefrontal cortex | - Palm et al. 2011<br>- Greenberg et al. 2013<br>- Ball et al 2013<br>- Burkhouse et al. 2016<br>- Andreescu et al. 2011<br>- Karim et al. 2016<br>- Palm et al. 2011<br>- White et al. 2017 | - Paulesu, et al. 2010<br>- Strawn et al. 2012 (left)<br>- McClure et al. 2007<br>- Wang et al. 2016<br>- Buff et al. 2017<br>- Kujawa et al. 2016<br>- Ellard et al. 2017<br>- Park et al. 2015                                                | - Etkin et al. 2009<br>- Cha et al. 2014b<br>- Andreescu et al. 2014<br>- Buff et al. 2016 | - Strawn et al. 2012<br>- Roy et al. 2013<br>- Strawn et al. 2012 |
| VLPFC             | - Diwadkar et al 2017<br>- MacNamara et al 2017<br>- Ball et al. 2013<br>- Liu et al. 2015<br>- Buff et al. 2017a<br>- Hölzel et al. 2013                                                    | - Hölzel et al. 2013<br>- Monk et al. 2006<br>- Park et al 2015<br>- Strawn et al. 2012<br>- Maslowsky et al. 2010<br>- Kujawa et al. 2016<br>- Moon et al 2015<br>- Moon et al. 2017<br>- Park et al. 2015                                     | - Mohlman et al. 2017<br>- Hölzel et al 2013                                               | - Monk et al. 2008<br>- Ellard et al. 2017                        |

|               |                                                                                                                                                                                       |                                                                                                                                                                                                                                                                                                                              |                                                              |                    |
|---------------|---------------------------------------------------------------------------------------------------------------------------------------------------------------------------------------|------------------------------------------------------------------------------------------------------------------------------------------------------------------------------------------------------------------------------------------------------------------------------------------------------------------------------|--------------------------------------------------------------|--------------------|
|               |                                                                                                                                                                                       | - Buff et al. 2016                                                                                                                                                                                                                                                                                                           |                                                              |                    |
| DLPFC         | - Moon et al. 2017<br>- Moon et al. 2017<br>- Moon et al. 2016                                                                                                                        | - MacNamara et al 2017<br>- Park et al 2015<br>- Buff et al. 2016                                                                                                                                                                                                                                                            | - Mohlman et al.<br>2017<br>- Andreescu et al. 2014          | - Buff et al. 2016 |
| Other regions | - White et al. 2017<br>- Moon et al. 2017<br>- Moon et al. 2017<br>- Hoehn-Saric et al. 2004<br>- Karim et al. 2017<br>- Xia et al. 2017<br>- Moon et al., 2015<br>- Moon et al. 2016 | - Park et al 2015<br>- Buff et al. 2016<br>- Blair et al. 2017<br>- Guyer et al. 2011<br>- Cha et al. 2014<br>- Moon et al. 2017<br>- Andreescu et al. 2014<br>- Karim et al. 2016<br>- Moon et al. 2015<br>- MacNamara et al. 2017<br>- Karim et al. 2017<br>- Buff et al. 2017<br>- Buff et al. 2017<br>- Moon et al. 2016 | - Cui et al. 2016<br>- Cha et al. 2014<br>- Qiao et al. 2017 | - Qiao et al. 2017 |

---

ACC = anterior cingulate cortex; ADC = apparent diffusion coefficient; DLPFC = dorsolateral prefrontal cortex; DTI = diffusion tensor imaging; DWI = diffusion weighted imaging; FA = fractional anisotropy; VLPFC = ventrolateral prefrontal cortex.

For full information on the references cited in the supplementary tables, please refer to the main article (<http://dx.doi.org/10.1590/1516-4446-2018-0108>).
